# Supplementary material
Source: ML conference proceedings conference paper supplement (https://openreview.net/forum?id=Is2oXblRtP)

Parity Plot: Actual vs. Predicted pChEMBL Values

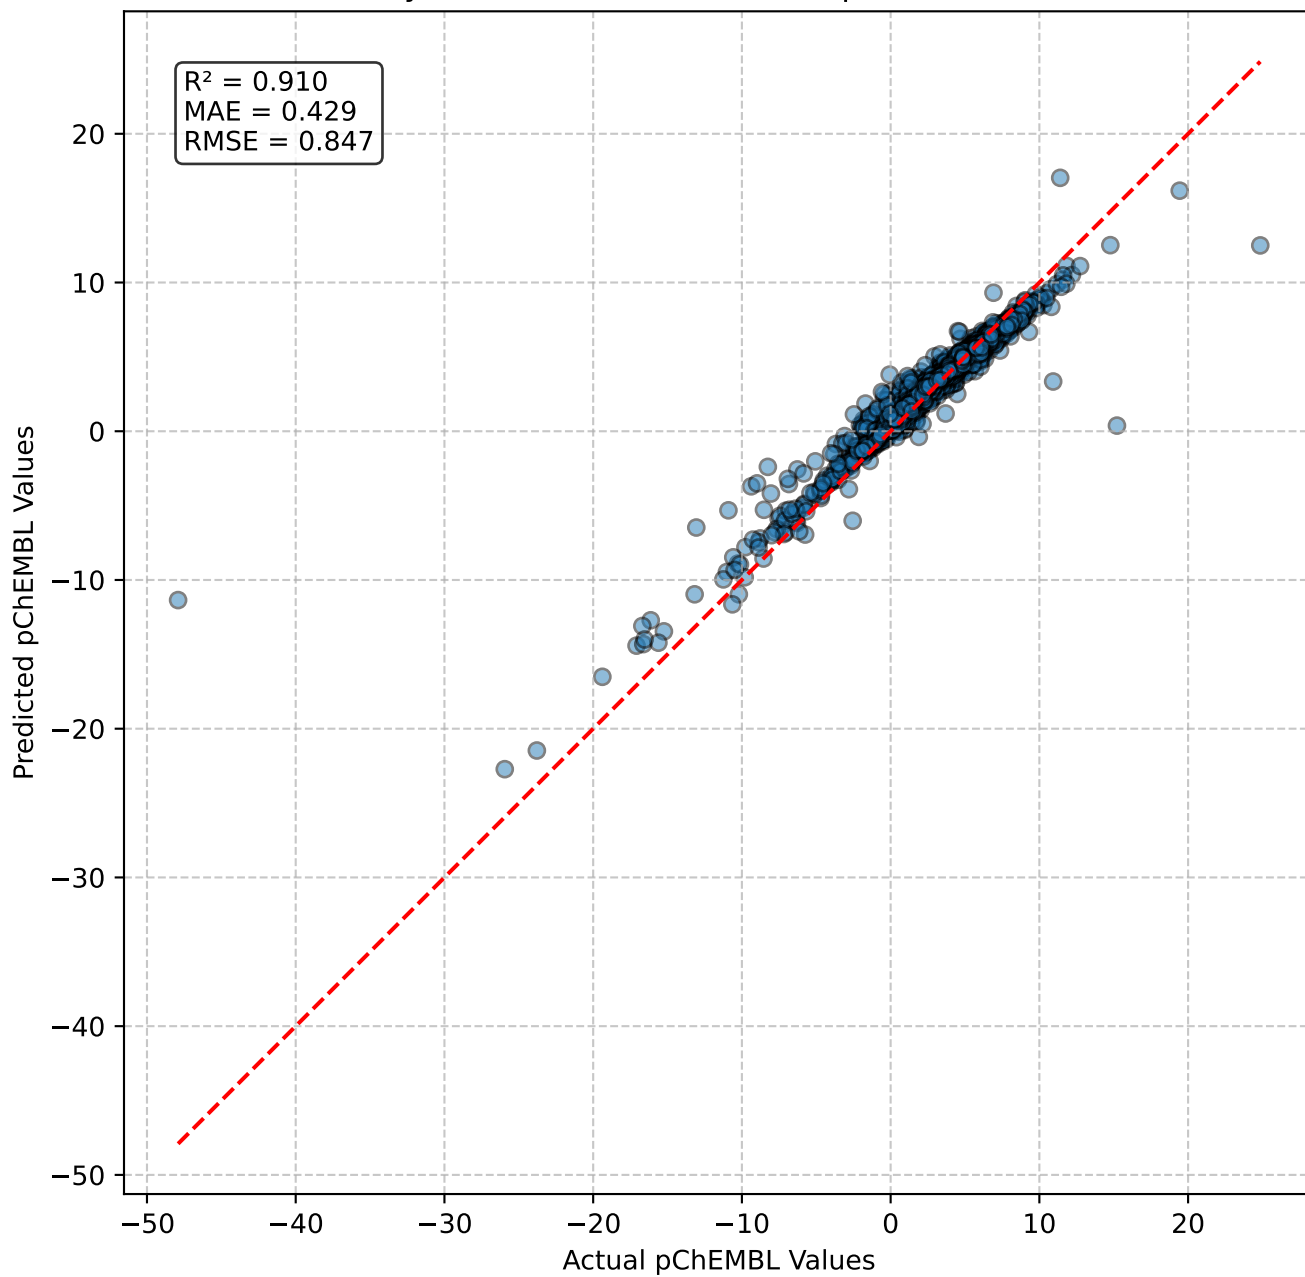

Supplement: supplementary_material [file best_r2_parity_plot.pdf › PiFlow_code/AgenX_Chembl35/plots/best_r2_parity_plot.pdf]

Loss vs. Epochs

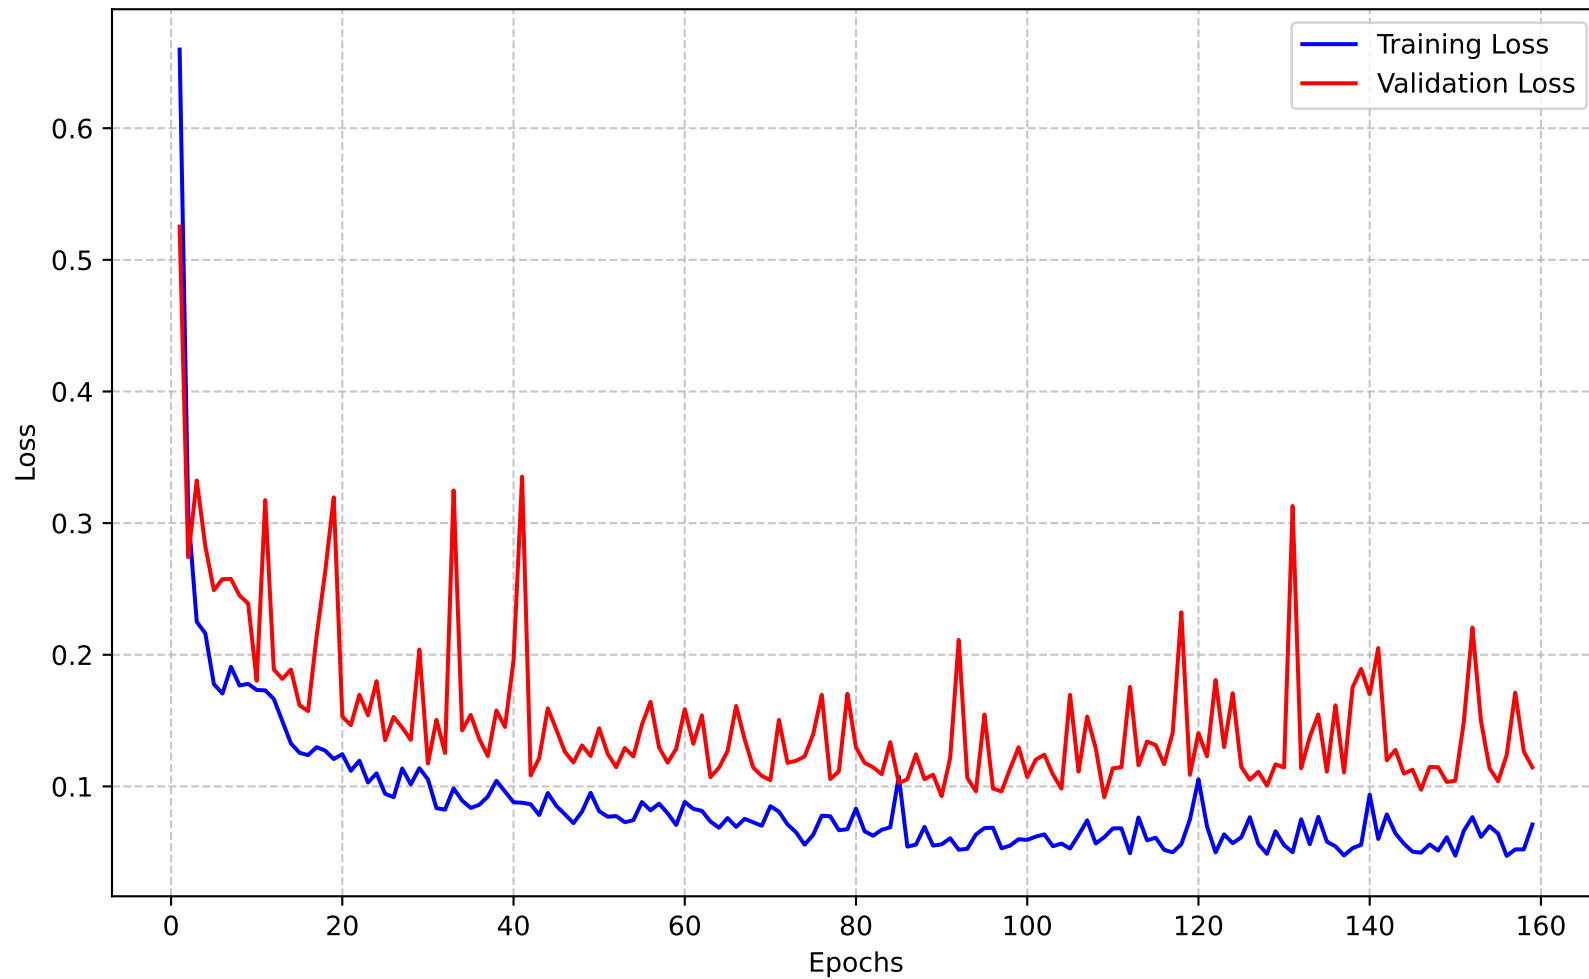

Supplement: supplementary_material [file loss_curve.pdf › PiFlow_code/AgenX_Chembl35/plots/loss_curve.pdf]

MAE vs. Epochs

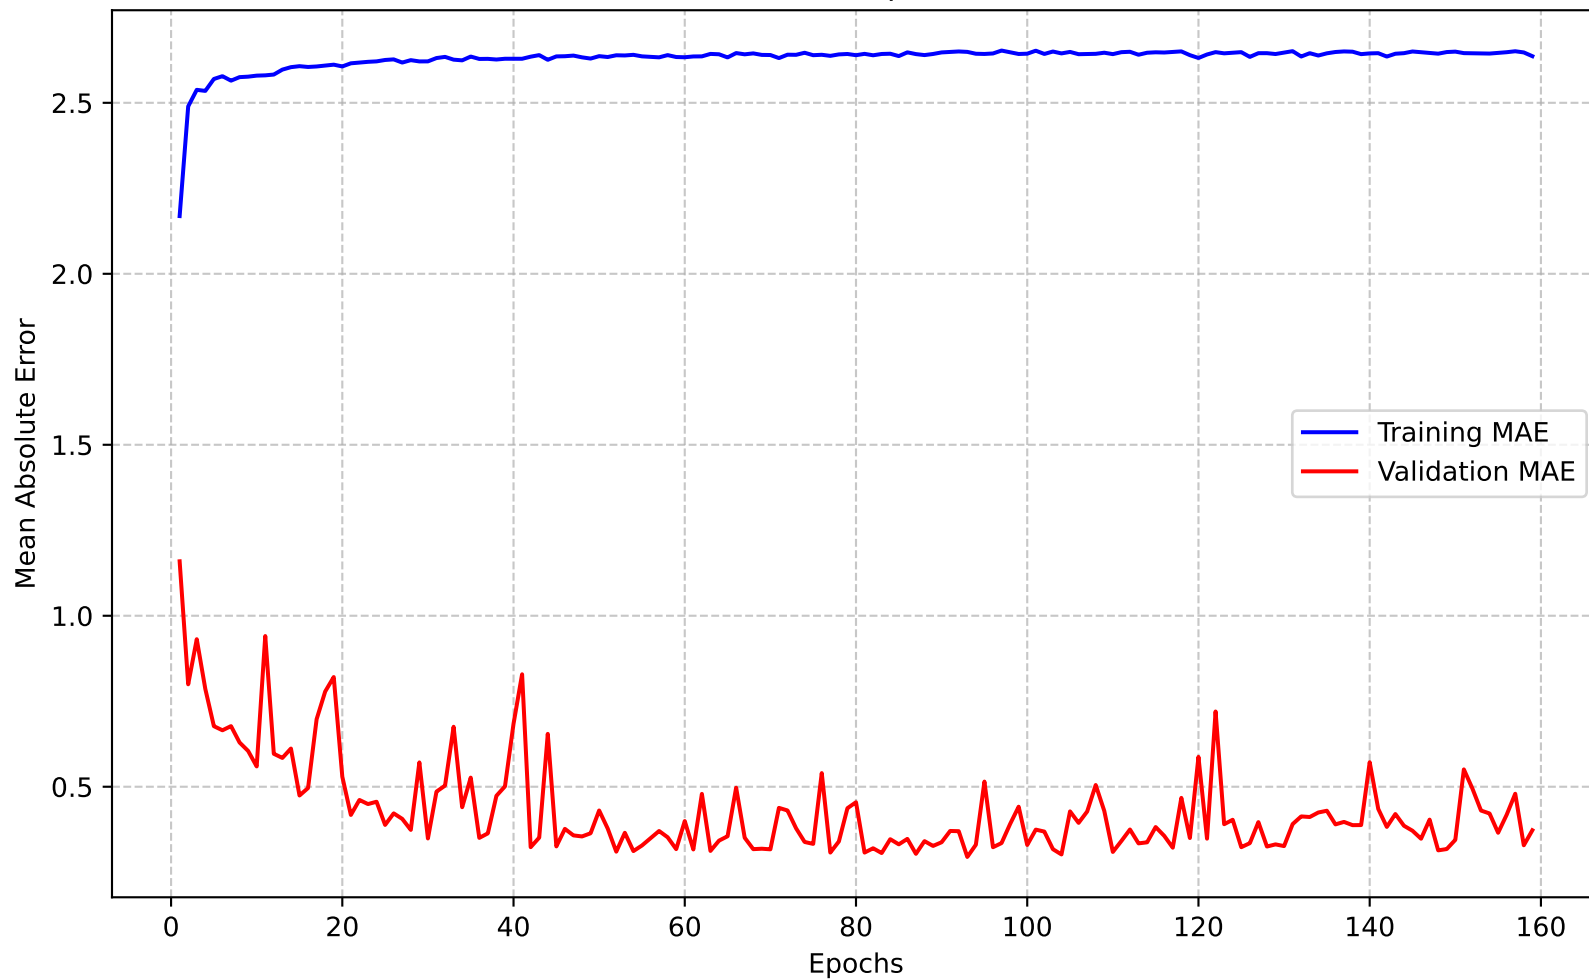

Supplement: supplementary_material [file mae_curve.pdf › PiFlow_code/AgenX_Chembl35/plots/mae_curve.pdf]

$R^2$  vs. Epochs

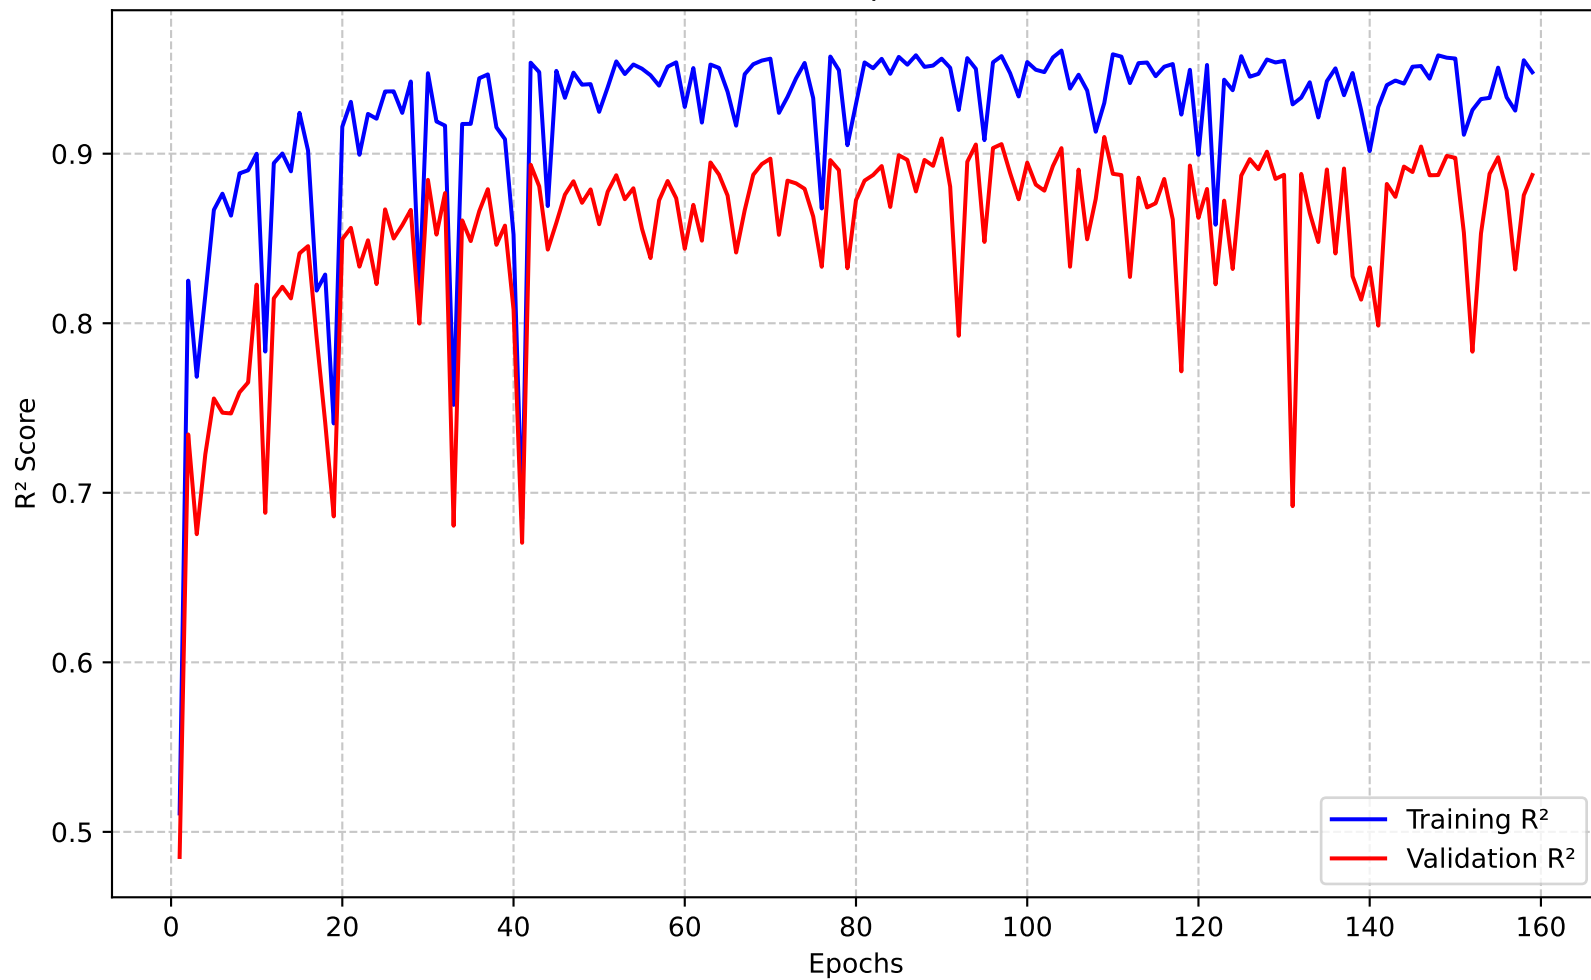

Supplement: supplementary_material [file r2_curve.pdf › PiFlow_code/AgenX_Chembl35/plots/r2_curve.pdf]

Model Performance: Predicted vs Actual g-factor

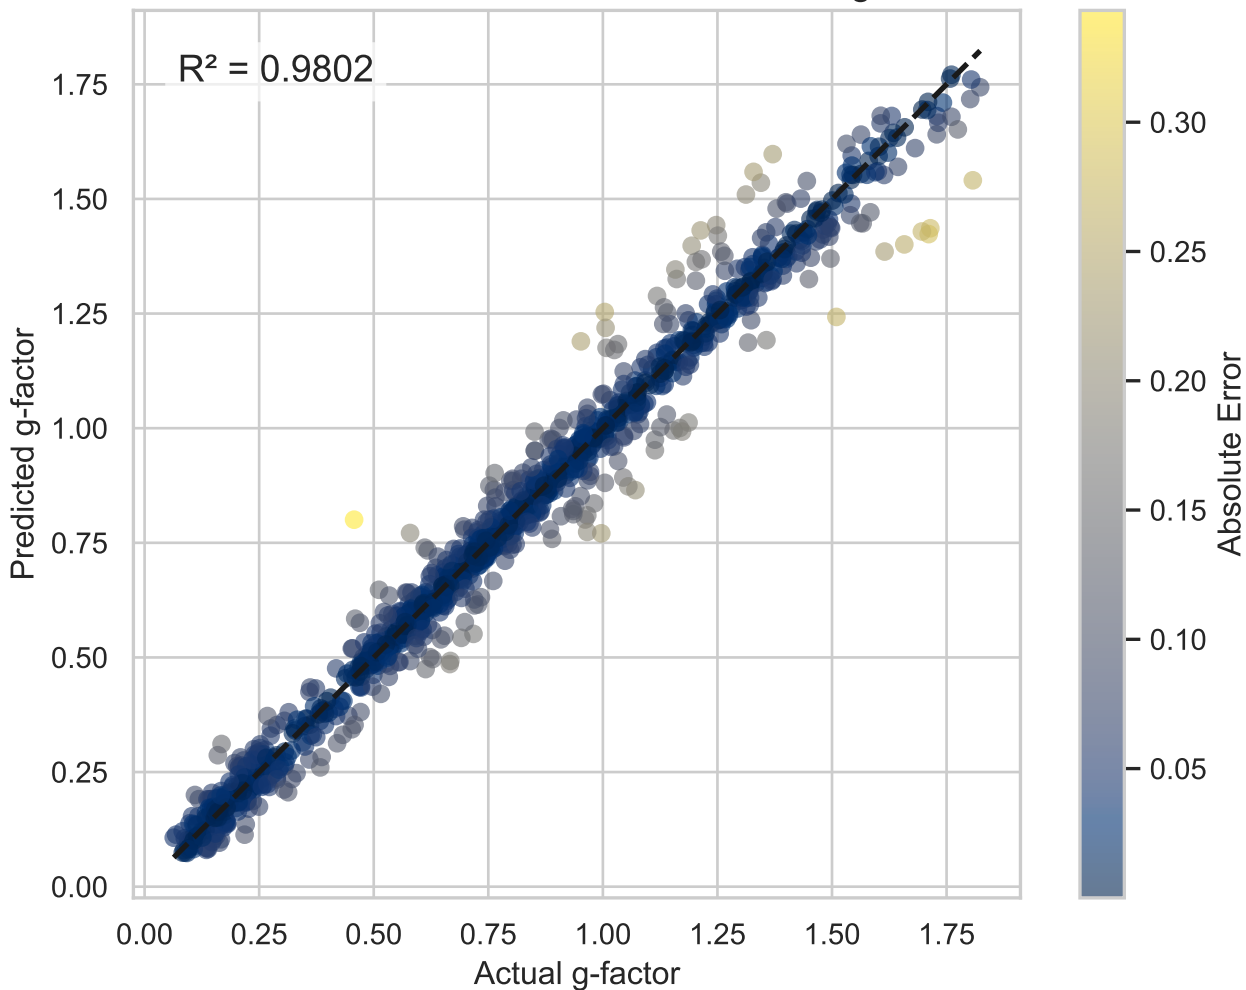

Supplement: supplementary_material [file r2_plot.pdf › PiFlow_code/AgenX_Nanohelix/figures/r2_plot.pdf]

# Training and Validation Loss

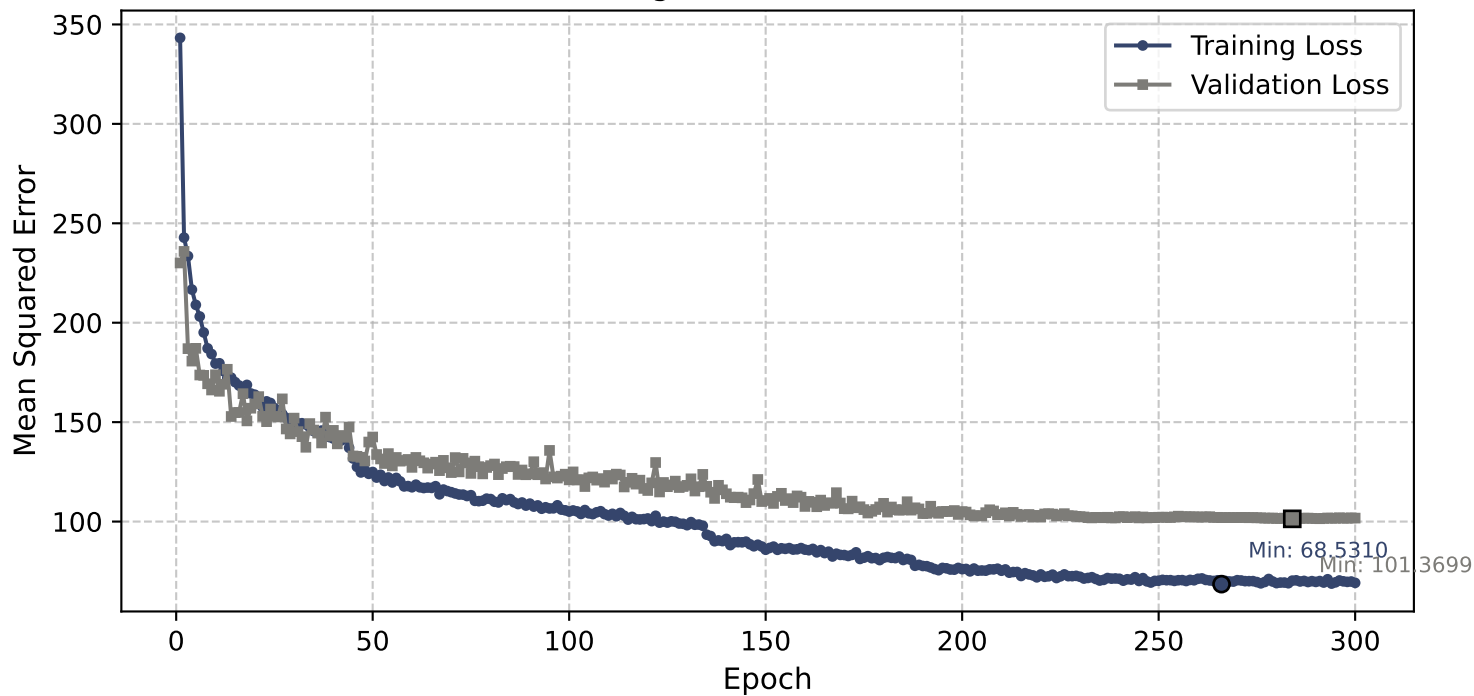

# Validation R<sup>2</sup> Score

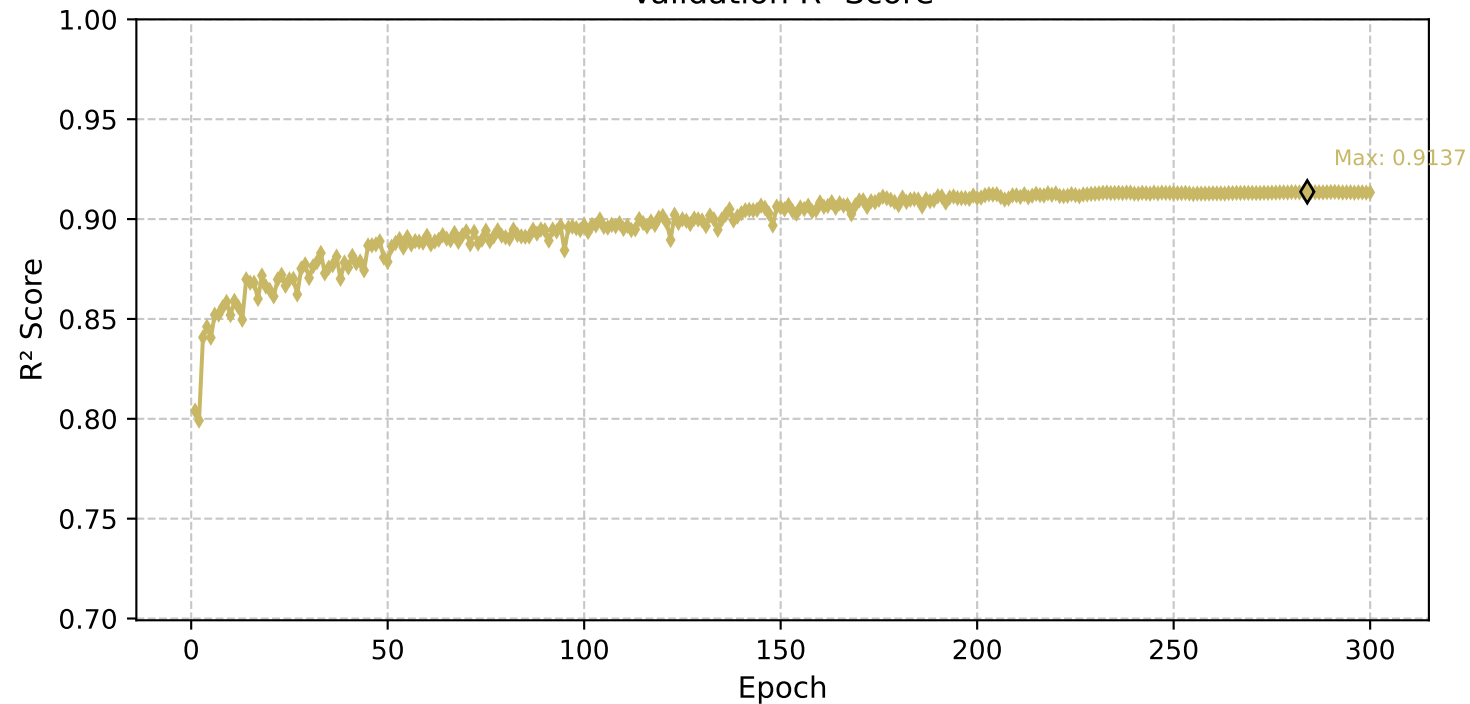

Supplement: supplementary_material [file supercon_metrics.pdf › PiFlow_code/AgenX_Supercon/figures/supercon_metrics.pdf]

Prediction vs. True Values ( $R^2 = 0.9133$ , RMSE = 10.09 K)

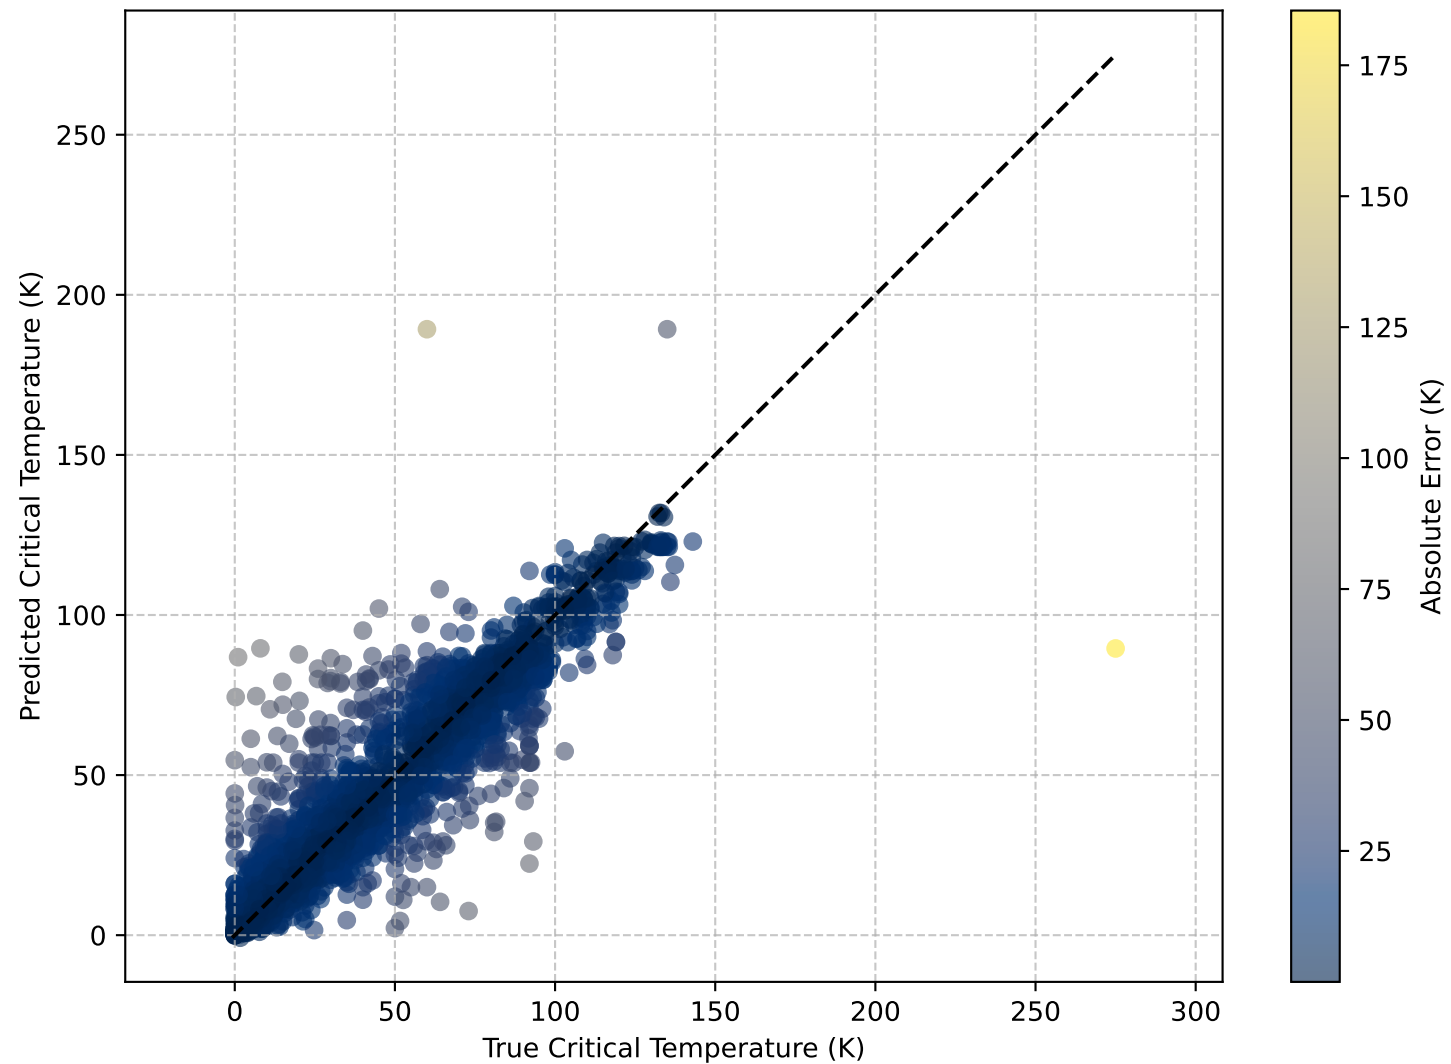

Supplement: supplementary_material [file supercon_predictions.pdf › PiFlow_code/AgenX_Supercon/figures/supercon_predictions.pdf]
